# Supplementary material for: Determination of light elements in biological samples by prompt nuclear reactions
Source: MDPI journal article supplement (doi:10.3390/ejihpe13080104), 1974-03-23
Supplement: s1 [file s1]

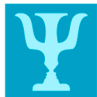

---

*Article*

# Personality Traits and Physical Activity: Insights from German University Students

Carsten Müller

**Table S1.** Pearson correlation coefficients for the association between personality traits and physical activity variables derived from IPAQ-SF

|                       | Extraversion | Negative Emotionality | Agreeableness | Conscientiousness | Open-Mindedness | vPA      | mPA      | walk |
|-----------------------|--------------|-----------------------|---------------|-------------------|-----------------|----------|----------|------|
| Extraversion          | 1            |                       |               |                   |                 |          |          |      |
| Negative Emotionality | -0.33 ***    | 1                     |               |                   |                 |          |          |      |
| Agreeableness         | 0.14 ***     | -0.24 ***             | 1             |                   |                 |          |          |      |
| Conscientiousness     | 0.24 ***     | -0.22 ***             | 0.19 ***      | 1                 |                 |          |          |      |
| Open-Mindedness       | 0.22 ***     | -0.15 ***             | 0.08 ***      | 0.06 ***          | 1               |          |          |      |
| vPA                   | 0.18 ***     | -0.14 ***             | 0.01          | 0.08 ***          | -0.03           | 1        |          |      |
| mPA                   | 0.16 ***     | -0.09 ***             | 0.05 ***      | 0.08 ***          | 0.04            | 0.28 *** | 1        |      |
| walk                  | 0.04 *       | -0.01                 | 0.02          | 0.03              | 0.07 ***        | 0.02     | 0.20 *** | 1    |

\*\*\* indicates  $p < 0.001$ , \*\* indicates  $p < 0.01$ , \* indicates  $p < 0.05$ ; vPA = vigorous physical activity, mPA = moderate physical activity

**Table S2.** Association between personality traits and self-reported vigorous physical activity after controlling for covariates

| Variable                   | Model 1 |          | Model 2 |          | Model 3 |           | Model 4 |          | Model 5 |          | Model 6 |          | Model 7 |           |
|----------------------------|---------|----------|---------|----------|---------|-----------|---------|----------|---------|----------|---------|----------|---------|-----------|
|                            | B       | $\beta$  | B       | $\beta$  | B       | $\beta$   | B       | $\beta$  | B       | $\beta$  | B       | $\beta$  | B       | $\beta$   |
| Intercept                  | -124.5  |          | -768.6  |          | 360.9   |           | -46.5   |          | -351.3  |          | 149.7   |          | -16.6   |           |
| Self-rated Health          | 267.5   | 0.17 *** | 213.8   | 0.14 *** | 229.7   | 0.15 ***  | 269.1   | 0.17 *** | 255.9   | 0.16 *** | 269.0   | 0.17 *** | 195.1   | 0.12 ***  |
| Fruit and Vegetable Intake | 229.1   | 0.11 *** | 203.2   | 0.10 *** | 222.6   | 0.11 ***  | 230.2   | 0.11 *** | 223.8   | 0.11 *** | 243.4   | 0.12 *** | 221.9   | 0.11 ***  |
| Sex (f=0, m=1)             | 232.0   | 0.08 *** | 269.6   | 0.09 *** | 195.6   | 0.07 ***  | 225.7   | 0.08 *** | 248.9   | 0.09 *** | 240.5   | 0.08 *** | 261.6   | 0.09 ***  |
| Age                        | -12.5   | -0.04 *  | -9.8    | -0.03    | -13.1   | -0.04 *   | -12.7   | -0.04 *  | -12.5   | -0.04 *  | -11.7   | -0.04 *  | -8.0    | -0.02     |
| Income                     | -37.3   | -0.04 *  | -57.3   | -0.05 *  | -40.1   | -0.04 *   | -38.0   | -0.04 *  | -38.9   | -0.04 *  | -34.7   | -0.03    | -57.3   | -0.05 **  |
| Extraversion               |         |          | 279.1   | 0.15 *** |         |           |         |          |         |          |         |          | 301.1   | 0.16 ***  |
| Negative Emotionality      |         |          |         |          | -102.6  | -0.06 *** |         |          |         |          |         |          | -49.5   | -0.03     |
| Agreeableness              |         |          |         |          |         |           | -20.8   | -0.01    |         |          |         |          | -57.3   | -0.03     |
| Conscientiousness          |         |          |         |          |         |           |         |          | 77.7    | 0.04 *   |         |          | 28.1    | 0.01      |
| Open-Mindedness            |         |          |         |          |         |           |         |          |         |          | -97.6   | -0.05 ** | -163.6  | -0.09 *** |

Model 1 examines the effect of the covariate set on self-reported vigorous physical activity, Models 2 to 6 add a single personality trait to Model 1 (Model 2 = Extraversion, Model 3 = Negative Emotionality, Model 4 = Agreeableness, Model 5 = Conscientiousness, Model 6 = Open-Mindedness); Model 7 adds all personality traits to Model 1. \*\*\* indicates  $p < 0.001$ , \*\* indicates  $p < 0.01$ , \* indicates  $p < 0.05$

**Table S3.** Association between personality traits and self-reported moderate physical activity after controlling for covariates

| Variable                   | Model 1 |          | Model 2 |          | Model 3 |          | Model 4 |          | Model 5 |          | Model 6 |          | Model 7 |          |
|----------------------------|---------|----------|---------|----------|---------|----------|---------|----------|---------|----------|---------|----------|---------|----------|
|                            | B       | $\beta$  |
| Intercept                  | 87.8    |          | -144.8  |          | 291.5   |          | -38.5   |          | -81.8   |          | 8.2     |          | -184.2  |          |
| Fruit and Vegetable Intake | 83.2    | 0.08 *** | 67.3    | 0.06 *** | 82.9    | 0.08 *** | 80.5    | 0.07 *** | 77.6    | 0.07 *** | 80.1    | 0.07 *** | 64.4    | 0.06 *** |
| Self-Esteem                | 49.6    | 0.07 *** | 19.3    | 0.03     | 32.9    | 0.04 *   | 46.9    | 0.06 *** | 41.6    | 0.06 **  | 47.4    | 0.06 *** | 9.0     | 0.01     |
| Alcohol Use                | 15.7    | 0.05 **  | 7.0     | 0.02     | 15.1    | 0.05 **  | 16.3    | 0.05 **  | 18.7    | 0.06 *** | 16.1    | 0.05 **  | 9.3     | 0.03     |
| Subjective Health          | 39.3    | 0.05 *   | 32.9    | 0.04 *   | 33.6    | 0.04 *   | 37.6    | 0.05 *   | 35.0    | 0.04 *   | 40.2    | 0.05 *   | 27.8    | 0.03     |
| Extraversion               |         |          | 134.8   | 0.13 *** |         |          |         |          |         |          |         |          | 124.5   | 0.12 *** |
| Negative Emotionality      |         |          |         |          | -42.1   | -0.05 *  |         |          |         |          |         |          | -17.9   | -0.02    |
| Agreeableness              |         |          |         |          |         |          | 38.5    | 0.03 *   |         |          |         |          | 17.1    | 0.01     |
| Conscientiousness          |         |          |         |          |         |          |         |          | 60.4    | 0.06 *** |         |          | 32.5    | 0.03     |
| Open-Mindedness            |         |          |         |          |         |          |         |          |         |          | 25.6    | 0.02     | -1.2    | 0        |

Model 1 examines the effect of the covariate set on moderate physical activity, Models 2 to 6 add a single personality trait to Model 1 (Model 2 = Extraversion, Model 3 = Negative Emotionality, Model 4 = Agreeableness, Model 5 = Conscientiousness, Model 6 = Open-Mindedness); Model 7 adds all personality traits to Model 1. \*\*\* indicates  $p < 0.001$ , \*\* indicates  $p < 0.01$ , \* indicates  $p < 0.05$

**Table S4.** Association between personality traits and self-reported walking after controlling for covariates

| Variable                   | Model 1 |           | Model 2 |           | Model 3 |           | Model 4 |           | Model 5 |          | Model 6 |           | Model 7 |           |
|----------------------------|---------|-----------|---------|-----------|---------|-----------|---------|-----------|---------|----------|---------|-----------|---------|-----------|
|                            | B       | $\beta$   | B       | $\beta$   | B       | $\beta$   | B       | $\beta$   | B       | $\beta$  | B       | $\beta$   | B       | $\beta$   |
| Intercept                  | 232.9   |           | 1.2     |           | 287.2   |           | 173.1   |           | 81.8    |          | 46.8    |           | -187.7  |           |
| Age                        | 21.7    | 0.11 ***  | 22.7    | 0.12 ***  | 21.7    | 0.11 ***  | 21.9    | 0.11 ***  | 22.1    | 0.11 *** | 21.3    | 0.11 ***  | 22.3    | 0.11 ***  |
| Fruit and Vegetable Intake | 71.7    | 0.06 ***  | 60.7    | 0.05 **   | 71.1    | 0.06 ***  | 70.5    | 0.06 ***  | 67.6    | 0.06 *** | 63.9    | 0.05 **   | 54.8    | 0.04 **   |
| Alcohol Use                | -21.3   | -0.06 *** | -26.7   | -0.07 *** | -21.6   | -0.06 *** | -21.1   | -0.06 *** | -19.0   | -0.05 ** | -20.3   | -0.05 *** | -23.6   | -0.06 *** |
| Sleep Quality              | 20.9    | 0.06 **   | 23.1    | 0.06 ***  | 22.4    | 0.06 **   | 21.0    | 0.06 **   | 22.5    | 0.06 *** | 20.8    | 0.06 **   | 23.2    | 0.06 ***  |
| Irritation                 | -33.3   | -0.06 **  | -29.3   | -0.05 **  | -26.3   | -0.04 *   | -32.1   | -0.05 **  | -34.2   | -0.06 ** | -30.9   | -0.05 **  | -30.8   | -0.05 *   |
| Income                     | -27.0   | -0.04 *   | -31.9   | -0.05 **  | -27.1   | -0.04 *   | -26.4   | -0.04 *   | -27.5   | -0.04 *  | -28.8   | -0.05 *   | -33.0   | -0.05 **  |
| Self-rated Health          | -35.4   | -0.04 *   | -47.4   | -0.05 **  | -39.4   | -0.04 *   | -35.7   | -0.04 *   | -41.3   | -0.04 *  | -35.2   | -0.04 *   | -47.9   | -0.05 **  |
| Extraversion               |         |           | 90.1    | 0.08 ***  |         |           |         |           |         |          |         |           | 75.2    | 0.07 **   |
| Negative Emotionality      |         |           |         |           | -24.5   | -0.02     |         |           |         |          |         |           | 6.5     | 0.01      |
| Agreeableness              |         |           |         |           |         |           | 13.8    | 0.01      |         |          |         |           | -4.2    | 0         |
| Conscientiousness          |         |           |         |           |         |           |         |           | 45.5    | 0.04 *   |         |           | 28.9    | 0.02      |
| Open-Mindedness            |         |           |         |           |         |           |         |           |         |          | 58.5    | 0.05 **   | 43.0    | 0.04 *    |

Model 1 examines the effect of the covariate set on self-reported walking, Models 2 to 6 add a single personality trait to Model 1 (Model 2 = Extraversion, Model 3 = Negative Emotionality, Model 4 = Agreeableness, Model 5 = Conscientiousness, Model 6 = Open-Mindedness); Model 7 adds all personality traits to Model 1. \*\*\* indicates  $p < 0.001$ , \*\* indicates  $p < 0.01$ , \* indicates  $p < 0.05$

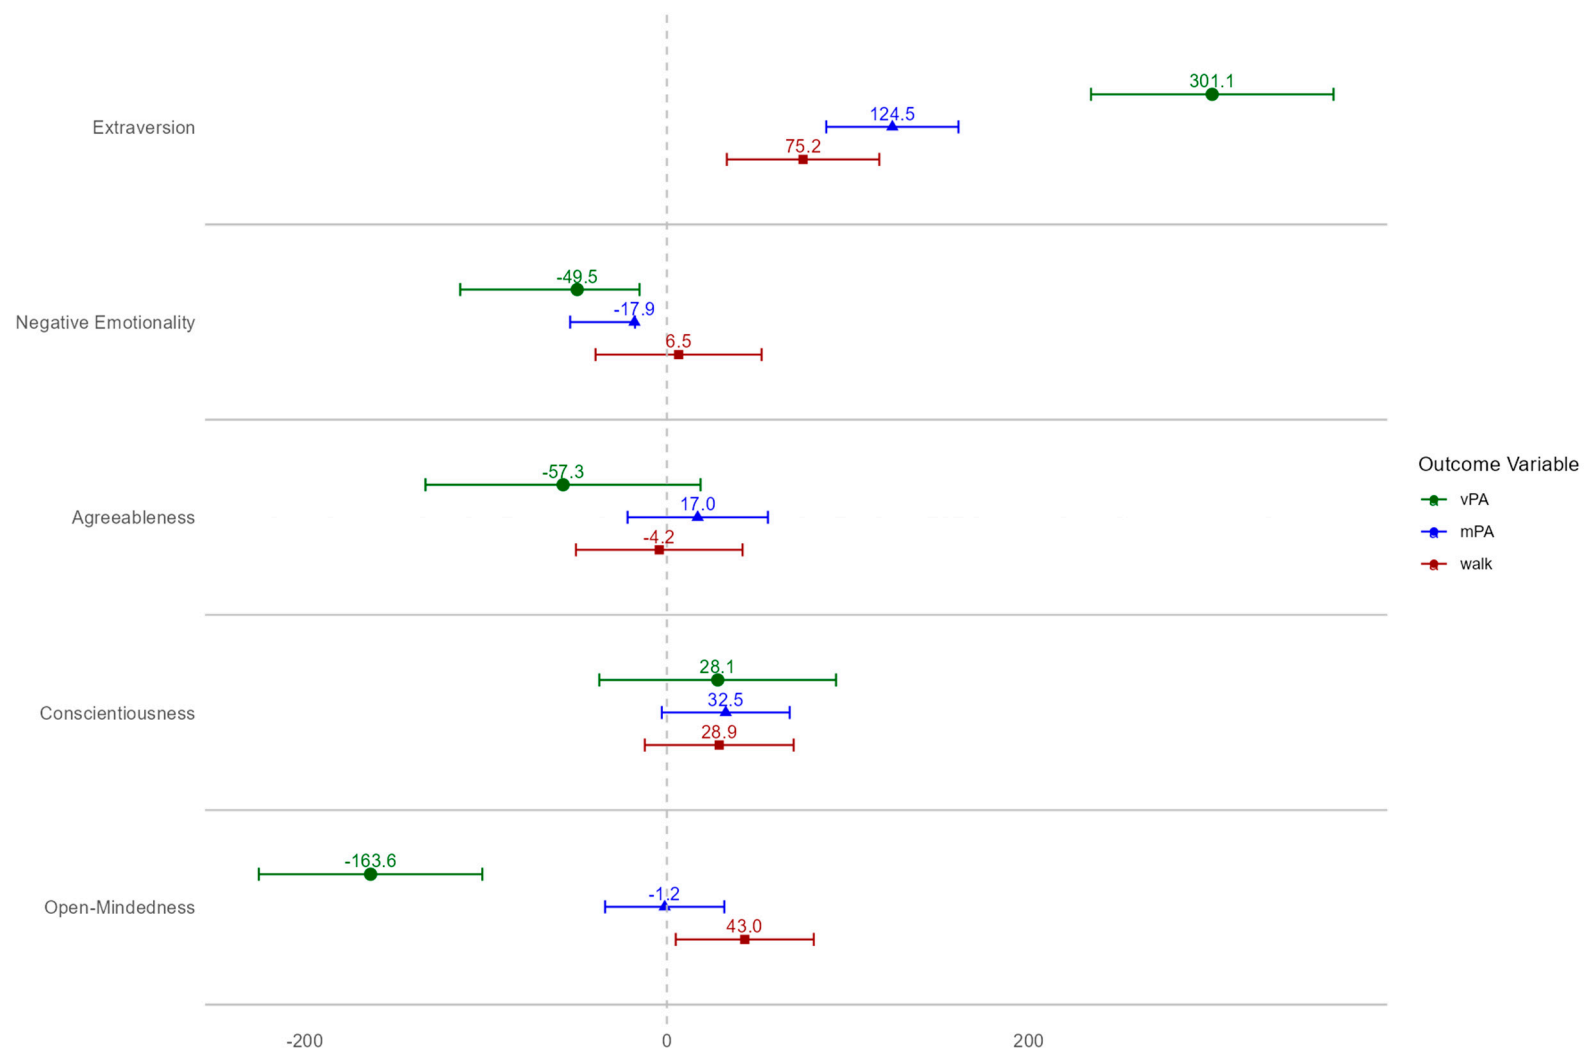

**Figure S1.** Association between personality traits and physical activity intensity variables (vPA = vigorous physical activity, mPA = moderate physical activity); Bars represent unstandardized regression coefficient and corresponding 95% confidence intervals for adjusted models (covariates: compare tables S2 – S4) in MET per week
